# Supplementary material for: Tenax-TA extraction as predictor for free available content of polycyclic aromatic hydrocarbons (PAHs) in composted sewage sludges
Source: Royal Society of Chemistry journal article supplement (doi:10.1039/b800532j), 2008-01-01
Supplement: b800532j.pdf [file b800532j.pdf]

**Supplementary Material (ESI) for Journal of Environmental Monitoring**

**Tenax extraction as predictor for free available  
content of polycyclic aromatic hydrocarbons (PAHs)  
in composted sewage sludges**

Patryk Oleszczuk

*Laboratory of Soil Reclamation and Waste Management, Institute of Soil  
Science and Environmental Management, University of Agriculture, ul.  
Leszczyńskiego 7, 20-069 Lublin, Poland*

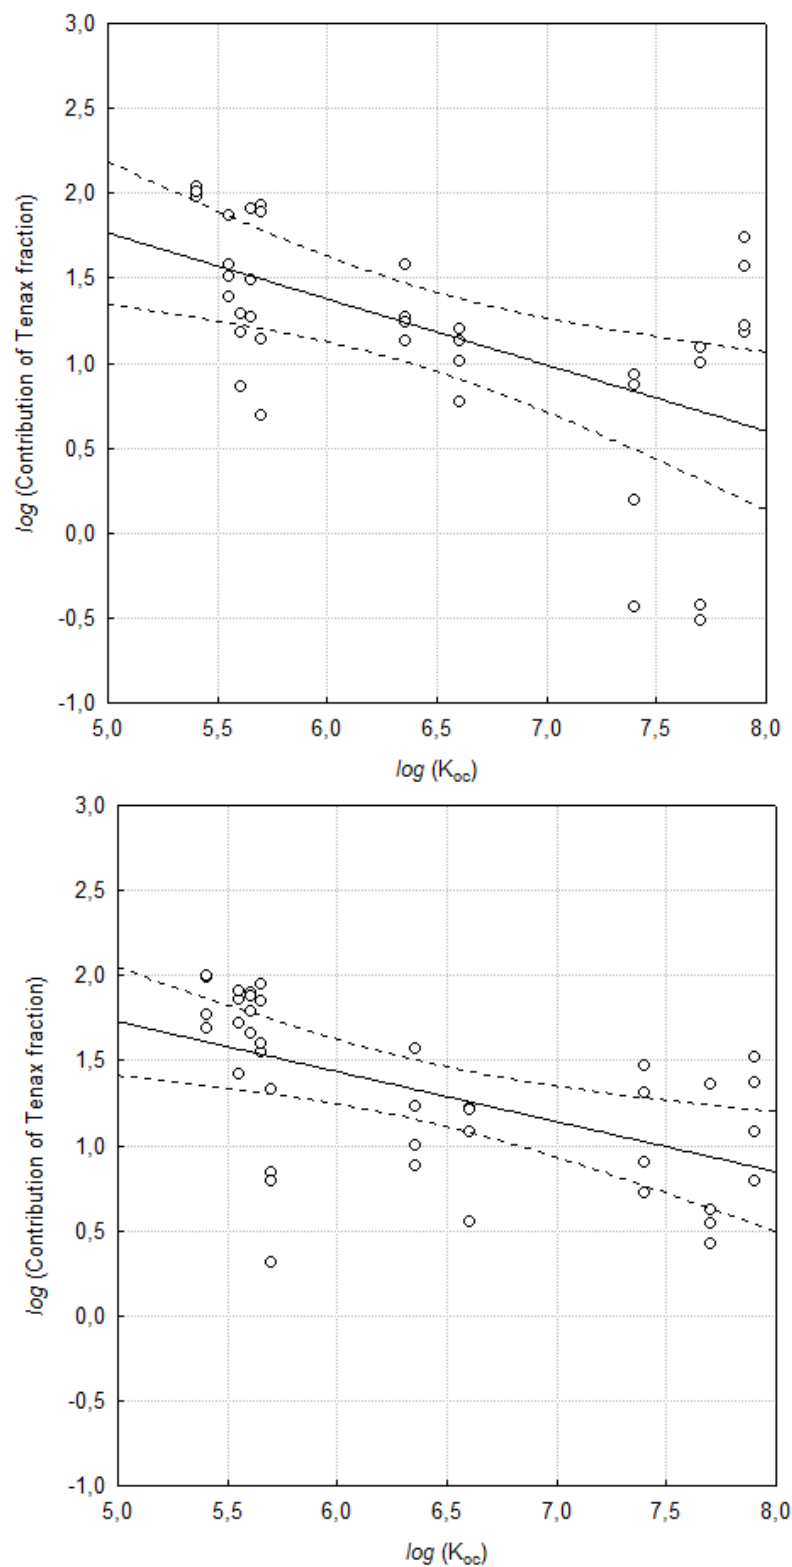

**Fig. S1.** Linear regression between  $\log(K_{oc})$  and  $\log(\text{contribution of Tenax fraction})$ . Dotted lines represent 95% confidence intervals.

Table S1. The content of individual PAHs in fraction extracted with dichloromethane (DCM) and Tenax-TA (TX)

| PAHs  | KR         |            |            |            | ZM       |            |           |            |
|-------|------------|------------|------------|------------|----------|------------|-----------|------------|
|       | SL         |            | C          |            | SL       |            | C         |            |
|       | DCM        | TX         | DCM        | TX         | DCM      | TX         | DCM       | TX         |
| Phen  | 169.0±11   | 183.3±9.0  | 206.8±7    | 101.4±5.9  | 107.0±9  | 117.5±7.8  | 74.5±4.7  | 72.6±5.7   |
| Ant   | 582.3±31   | 432.7±30   | 931.5±28   | 246.2±10.8 | 51.9±5   | 16.8±1.0   | 35.7±2.6  | 26.0±1.4   |
| Fluo  | 862.2±37   | 269.1±13   | 534.0±14   | 193.4±12.7 | 400.3±28 | 324.0±21.6 | 353.7±25  | 320.7±22.4 |
| Pyr   | 4834.7±186 | 4102.2±364 | 3171.2±202 | 66.2±3.4   | 687.6±62 | 96.0±7.8   | 442.3±22  | 95.7±5.8   |
| BaA   | 504.2±22   | 99.7±7.1   | 352.1±12   | 161.7±5.9  | 355.5±21 | 54.5±2.7   | 108.7±7.2 | 87.9±4.3   |
| Ch    | 282.9±15   | 53.0±3.8   | 287.6±8    | 29.2±1.9   | 157.3±14 | 60.7±3.5   | 86.9±8.5  | 32.8±2.6   |
| BbF   | 434.4±38   | 59.0±2.1   | 512.1±20   | 18.4±1.1   | 245.3±28 | 25.6±1.1   | 115.6±8.1 | 19.4±1.0   |
| BaP   | 1272.5±28  | 109.0±5.8  | 382.8±13   | 30.5±1.3   | 466.0±42 | 1.7±0.1    | 132.4±11  | 27.6±1.9   |
| BghiP | 719.9±17   | 73.7±4.2   | 267.8±10   | 7.1±0.5    | 341.3±27 | 1.3±0.1    | 101.4±7.4 | 3.6±0.2    |
| Ind   | 283.0±16   | 42.8±3.0   | 201.2±8    | 24.2±1.4   | 346.1±24 | 191.4±11.0 | 98.4±9.2  | 23.3±1.8   |

KR – sewage sludge from Krasnik, ZM – sewage sludge from Zamość; SL – sewage sludge; C – compost; Phen – phenanthrene; Ant – anthracene; Fluo – fluoranthene; Pyr – pyrene, BaA – benzo[a]anthracene; Ch – chryzene; BbF – benzo[b]fluoranthene; BaP – benzo[a]pyrene, BghiP – benzo[ghi]perylene; Ind – indeno[1,2,3-cd]pyrene; ± - standard deviation (n=3).

Table S2. The content of individual PAHs in fraction extracted with dichloromethane (DCM) and Tenax (TX)

| PAHs  | BJ        |            |          |            | LB       |            |          |            |
|-------|-----------|------------|----------|------------|----------|------------|----------|------------|
|       | SL        |            | C        |            | SL       |            | C        |            |
|       | DCM       | TX         | DCM      | TX         | DCM      | TX         | DCM      | TX         |
| Phen  | 226.8±14  | 220.2±15.9 | 162.2±6  | 161.5±13.2 | 173.4±11 | 178.9±15.0 | 118.6±7  | 69.8±6.1   |
| Ant   | 119.1±3   | 46.2±3.2   | 80.6±4   | 66.5±4.8   | 72.2±5   | 18.1±1.3   | 61.3±3   | 32.2±3.1   |
| Fluo  | 1163.5±48 | 952.8±51.5 | 631.8±30 | 253.5±17.4 | 572.0±31 | 107.7±8.2  | 479.5±31 | 344.8±24.8 |
| Pyr   | 1125.9±43 | 55.4±3.4   | 680.1±21 | 48.2±4.4   | 852.1±38 | 670.0±35.5 | 405.5±30 | 25.3±2.1   |
| BaA   | 628.2±33  | 96.7±5.7   | 383.7±20 | 289.9±19.8 | 337.2±22 | 24.7±1.7   | 142.9±8  | 89.4±7.8   |
| Ch    | 260.9±11  | 35.9±3.0   | 259.7±11 | 19.8±1.8   | 148.2±11 | 26.3±1.2   | 84.6±4   | 14.4±0.9   |
| BbF   | 368.5±13  | 59.2±2.8   | 188.6±7  | 23.1±1.7   | 253.3±14 | 15.2±1.1   | 91.7±3   | 15.2±1.5   |
| BaP   | 549.1±27  | 8.6±0.5    | 212.2±10 | 11.4±0.9   | 236.6±11 | 17.8±0.9   | 110.5±3  | 33.2±2.7   |
| BghiP | 354.2±14  | 1.1±0.1    | 121.9±4  | 28.1±1.9   | 119.4±4  | 14.8±0.7   | 136.3±7  | 5.7±0.3    |
| Ind   | 166.3±10  | 61.8±2.7   | 140.4±5  | 8.7±0.8    | 64.1±4   | 10.8±0.7   | 68.7±5   | 22.9±1.9   |

BJ – sewage sludge from Bilgoraj, LB – sewage sludge from Lublin; SL – sewage sludge; C – compost; Phen – phenanthrene; Ant – anthracene; Fluo – fluoranthene; Pyr – pyrene, BaA – benzo[a]anthracene; Ch – chryzene; BbF – benzo[b]fluoranthene; BaP – benzo[a]pyrene, BghiP – benzo[ghi]perylene; Ind – indeno[1,2,3-cd]pyrene; ± - standard deviation (n=3).
